# Supplementary material
Source: PubMed Central journal article supplement (PMC10992211)
Supplement: 262_2020_2806_MOESM1_ESM.pdf [file 262_2020_2806_MOESM1_ESM.pdf]

**Supplementary Figure 1. Representative immunohistochemistry images of CD47 expression in gastric cancer.**

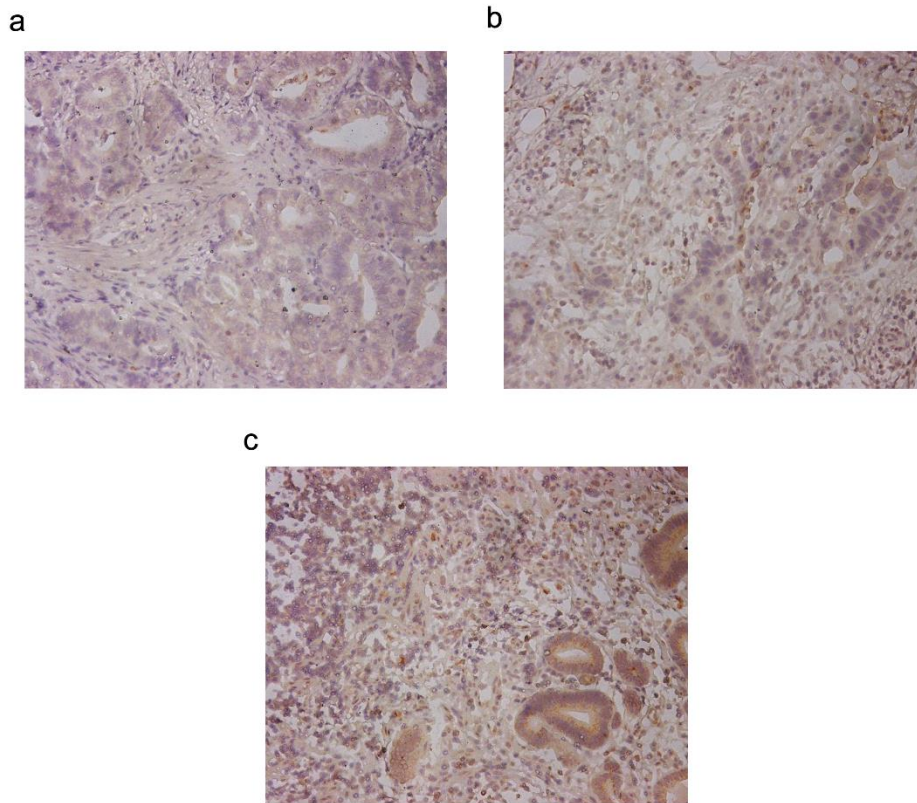

Expression of CD47 in sections of gastric cancer. Representative photographs of weak (a), moderate (b) and strong (c) staining of CD47. Original magnification:  $\times 200$ .

352x249mm (72\*72 DPI).
